# Supplementary material for: Tuning Mechanical Properties of Pseudopeptide Supramolecular Hydrogels by Graphene Doping
Source: PubMed Central journal article supplement (PMC6930602; doi:10.3390/molecules24234345), 2019-11-28
Supplement: molecules-24-04345-s001.pdf [file molecules-24-04345-s001.pdf]

# Supporting Information

## Tuning Pseudopeptide Supramolecular Hydrogels Mechanical Properties by Graphene Doping

Demetra Giuri <sup>1</sup>, Marianna Barbalinardo <sup>2</sup>, Nicola Zanna <sup>1</sup>, Paolo Paci <sup>1</sup>, Marco Montalti <sup>1</sup>, Massimiliano Cavallini <sup>2</sup>, Francesco Valle <sup>2</sup>, Matteo Calvaresi <sup>1\*</sup>, Claudia Tomasini <sup>1\*</sup>

<sup>1</sup> Dipartimento di Chimica “Giacomo Ciamician” Università di Bologna - Via Selmi, 2 - 40126 Bologna - Italy; [claudia.tomasini@unibo.it](mailto:claudia.tomasini@unibo.it); [matteo.calvaresi3@unibo.it](mailto:matteo.calvaresi3@unibo.it)

<sup>2</sup> Istituto per lo Studio dei Materiali Nanostrutturati, Consiglio Nazionale delle Ricerche, (ISMN-CNR) - Via P. Gobetti 101 – 40129 Bologna – Italy

### Contents

|                                                                                                                               |         |
|-------------------------------------------------------------------------------------------------------------------------------|---------|
| <b>Figure S1.</b> Photographs of hydrogels <b>1-16</b>                                                                        | Page S1 |
| <b>Table S1.</b> Summary of the Rheological properties of hydrogels <b>1-16</b>                                               | Page S2 |
| <b>Figure S2.</b> Frequency dependence of storage modulus (black) and loss modulus (red) for hydrogels <b>1-8</b>             | Page S3 |
| <b>Figure S3.</b> Frequency dependence of storage modulus (black) and loss modulus (red) for hydrogels <b>9-16</b>            | Page S4 |
| <b>Figure S4.</b> Values of storage moduli and loss moduli during a step strain experiment performed on hydrogels <b>1-8</b>  | Page S5 |
| <b>Figure S5.</b> Values of storage moduli and loss moduli during a step strain experiment performed on hydrogels <b>9-16</b> | Page S6 |
| <b>Figure S6.</b> SEM images of aerogel obtained by freeze drying hydrogels samples <b>1-16</b>                               | Page S7 |
| <b>Figure S7.</b> Selected regions of ATR-IR spectra of aerogels <b>1-16</b>                                                  | Page S8 |
| <b>Figure S8.</b> Cell viability of NIH-3T3 in cellular medium after destruction of the hydrogel matrix.                      | Page S9 |

| Trigger                         | % Graphene                                                                                |                                                                                           |                                                                                            |                                                                                             |
|---------------------------------|-------------------------------------------------------------------------------------------|-------------------------------------------------------------------------------------------|--------------------------------------------------------------------------------------------|---------------------------------------------------------------------------------------------|
|                                 | 0                                                                                         | 0.5                                                                                       | 1                                                                                          | 5                                                                                           |
| GdL<br>(1%<br>gelator<br>Conc.) | 1<br>    | 2<br>    | 3<br>    | 4<br>    |
|                                 | 5<br>   | 6<br>   | 7<br>   | 8<br>   |
|                                 | 9<br>  | 10<br> | 11<br> | 12<br> |
|                                 | 13<br> | 14<br> | 15<br> | 16<br> |

Figure S1. Photographs of hydrogels 1-16.

| <b>Table S1.</b> Summary of the Rheological properties of hydrogels <b>1-16</b> . |         |               |            |
|-----------------------------------------------------------------------------------|---------|---------------|------------|
| Entry                                                                             | Trigger | G' (Pa)       | G'' (Pa)   |
| <b>1</b>                                                                          | GdL     | 34300-35200   | 1100-2900  |
| <b>2</b>                                                                          | GdL     | 30000-33300   | 1000-4300  |
| <b>3</b>                                                                          | GdL     | 45700-48300   | 1500-4100  |
| <b>4</b>                                                                          | GdL     | 75000-84200   | 3700-5900  |
| <b>5</b>                                                                          | GdL     | 31000-36000   | 3200-4200  |
| <b>6</b>                                                                          | GdL     | 46700-47700   | 2600-4300  |
| <b>7</b>                                                                          | GdL     | 50600-54900   | 2500-5100  |
| <b>8</b>                                                                          | GdL     | 64000-75900   | 4200-7600  |
| <b>9</b>                                                                          | Arg     | 20900-26400   | 3100-3500  |
| <b>10</b>                                                                         | Arg     | 39600-42300   | 900-4700   |
| <b>11</b>                                                                         | Arg     | 42700-49300   | 2400-3200  |
| <b>12</b>                                                                         | Arg     | 75800-77700   | 5800-7900  |
| <b>13</b>                                                                         | Arg     | 62000-72600   | 4400-12000 |
| <b>14</b>                                                                         | Arg     | 78200-86300   | 4200-6900  |
| <b>15</b>                                                                         | Arg     | 110400-110700 | 6400-13100 |
| <b>16</b>                                                                         | Arg     | 112000-129000 | 7100-12200 |

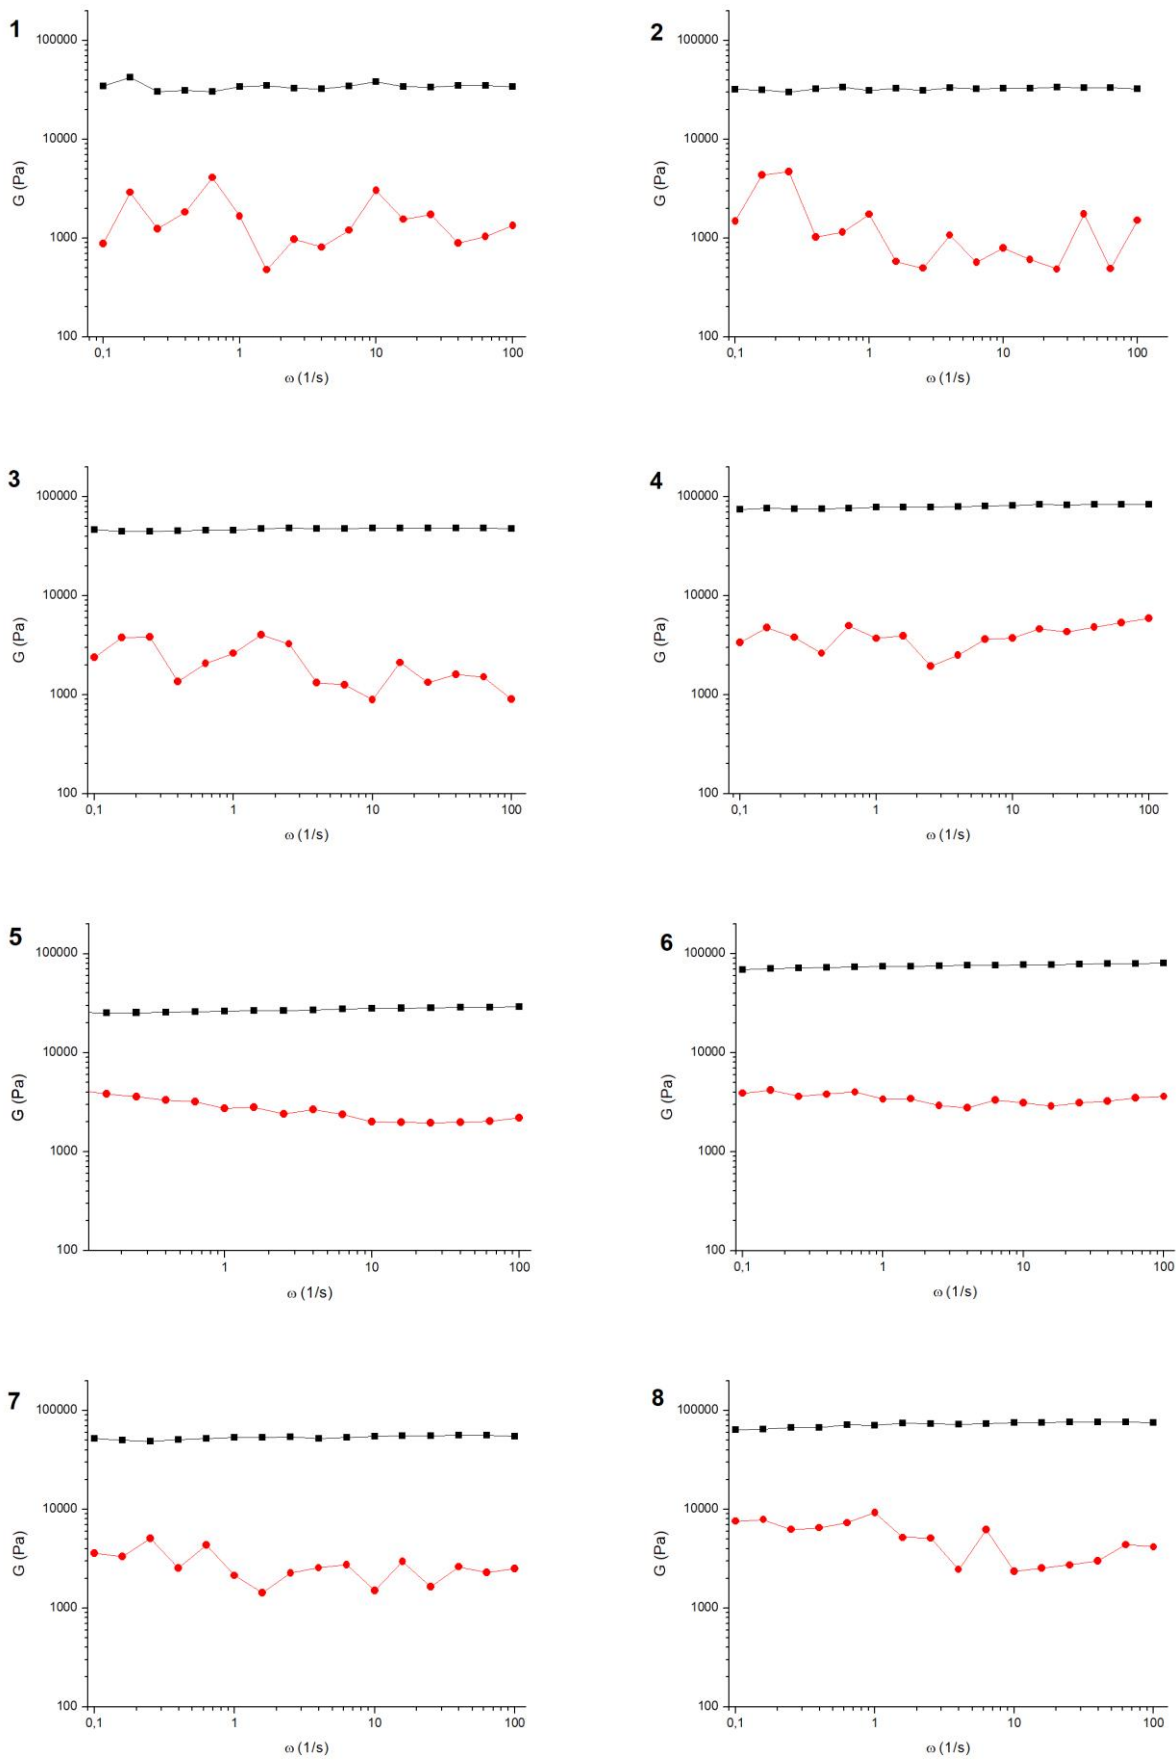

**Figure S2.** Frequency dependence of storage modulus (black) and loss modulus (red) for hydrogels 1-8.

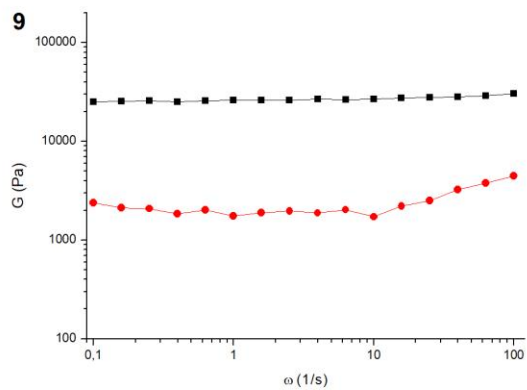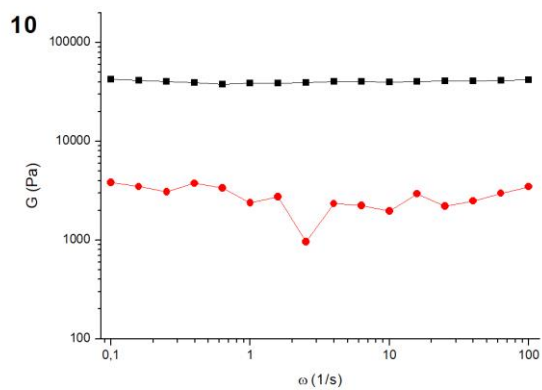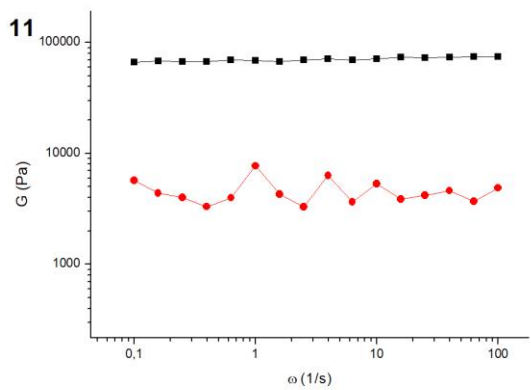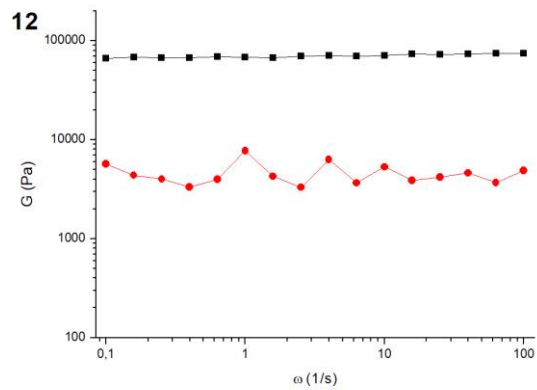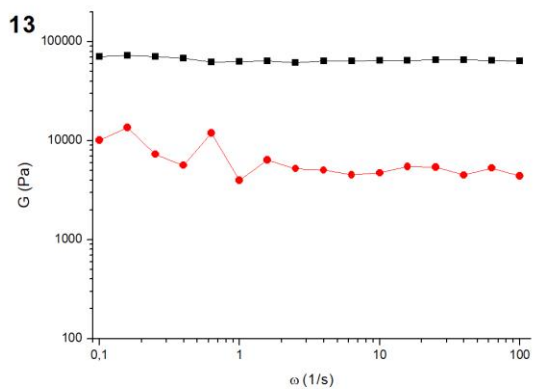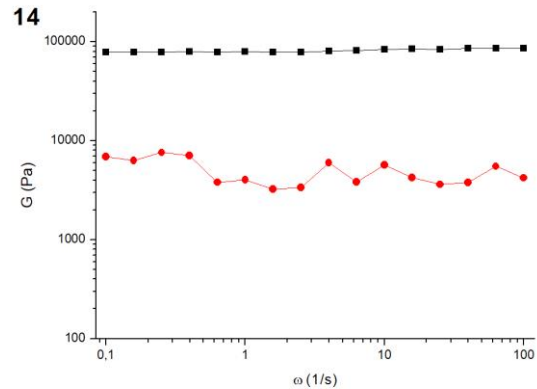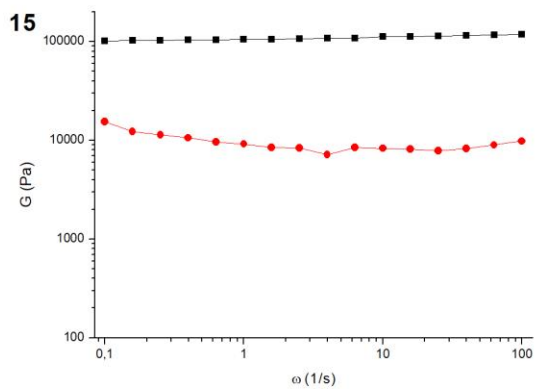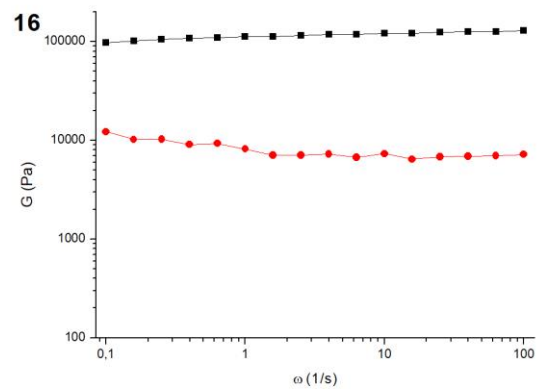

**Figure S3.** Frequency dependence of storage modulus (black) and loss modulus (red) for hydrogels 9-16.

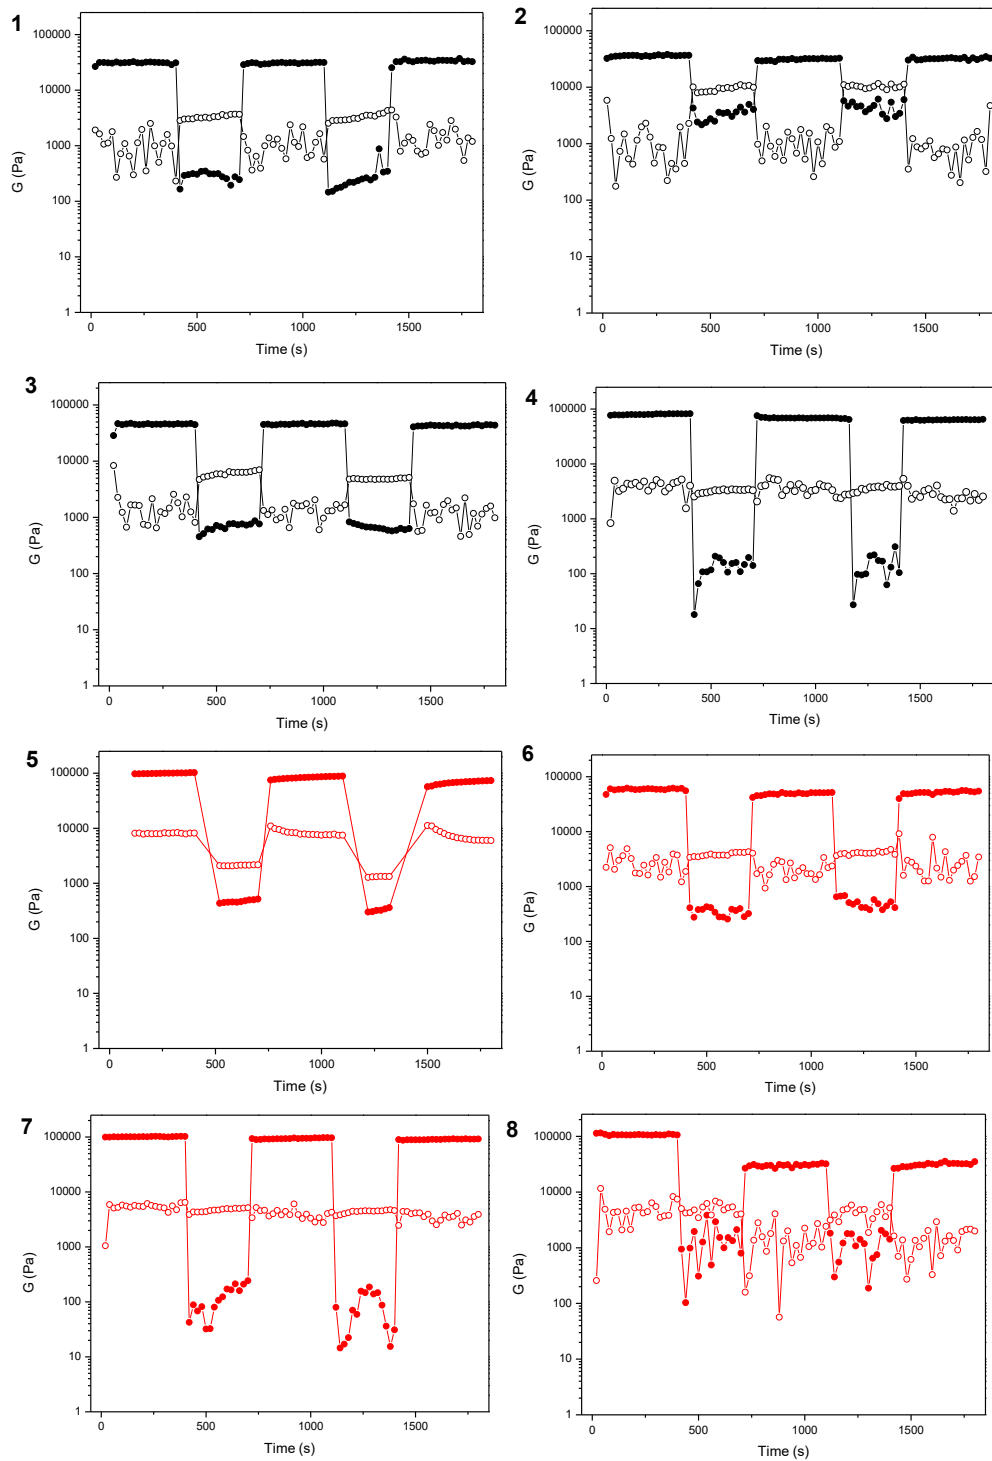

**Figure S4.** Values of storage moduli (solid circles) and loss moduli (empty circles) during a step strain experiment performed on hydrogels 1-8.

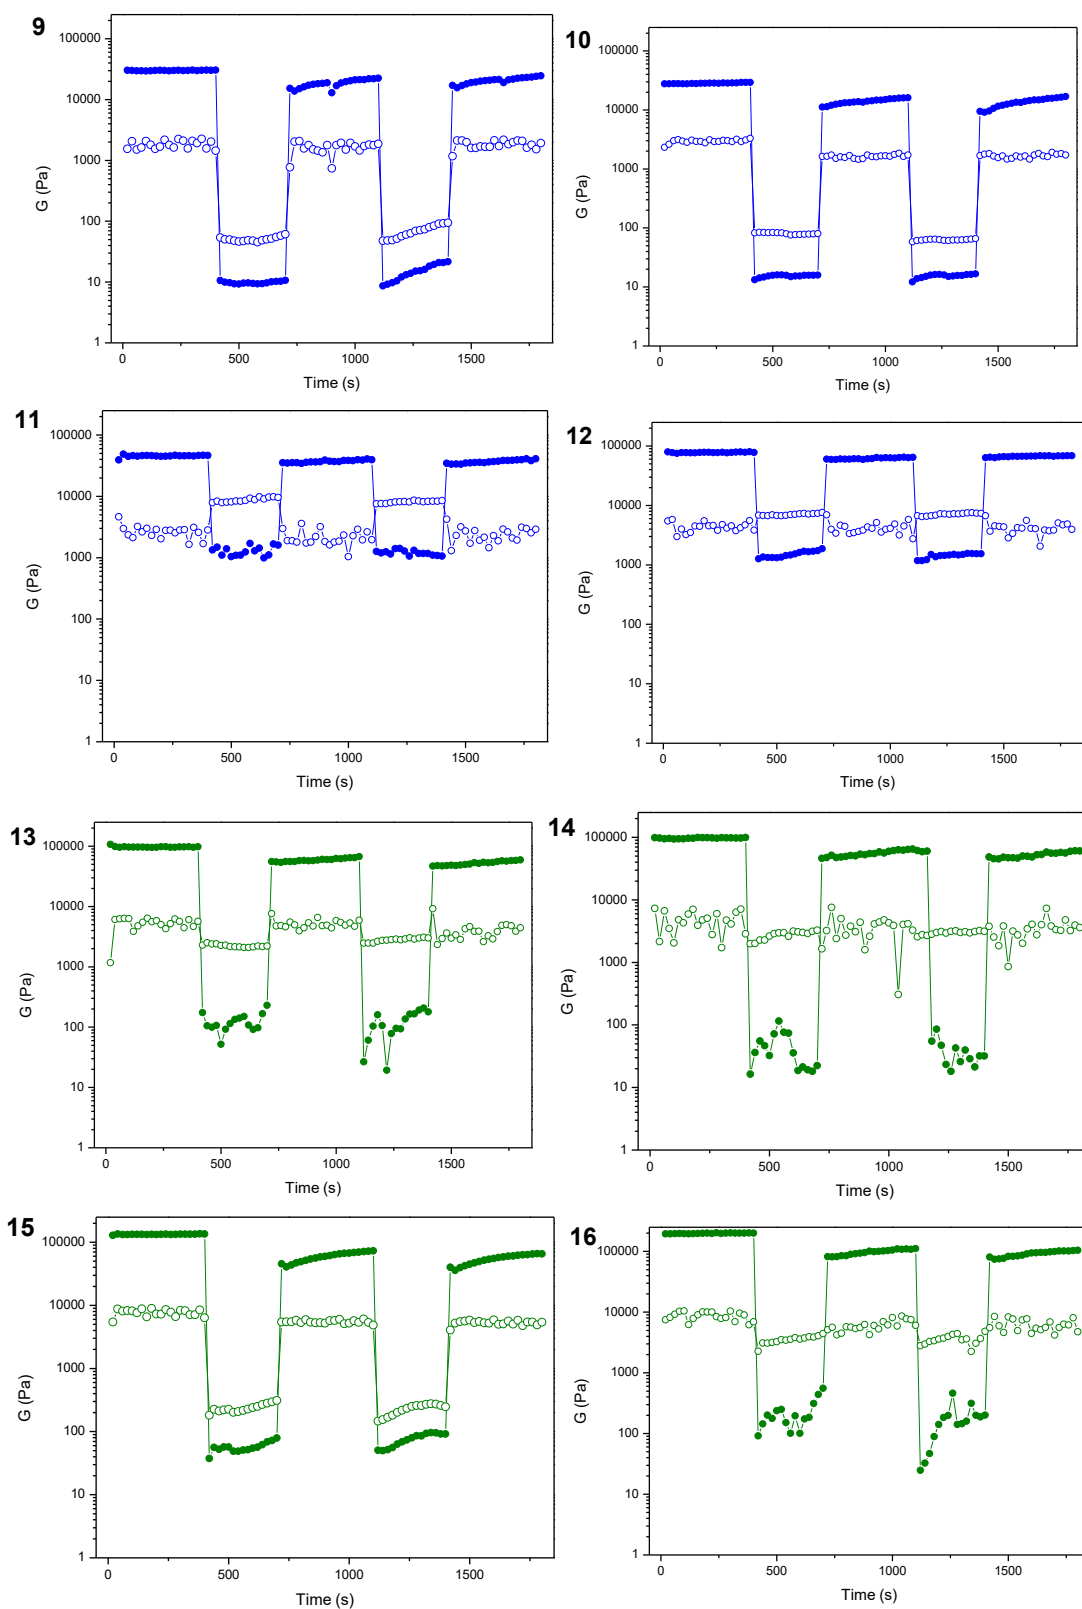

**Figure S5.** Values of storage moduli (solid circles) and loss moduli (empty circles) during a step strain experiment performed on hydrogels **9-16**.

| Trigger                         | % Graphene                                                                                |                                                                                           |                                                                                            |                                                                                             |
|---------------------------------|-------------------------------------------------------------------------------------------|-------------------------------------------------------------------------------------------|--------------------------------------------------------------------------------------------|---------------------------------------------------------------------------------------------|
|                                 | 0                                                                                         | 0.5                                                                                       | 1                                                                                          | 5                                                                                           |
| GdL<br>(1%<br>gelator<br>Conc.) | 1<br>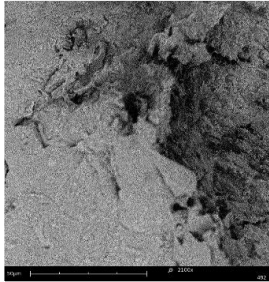    | 2<br>    | 3<br>    | 4<br>    |
|                                 | 5<br>   | 6<br>   | 7<br>   | 8<br>   |
|                                 | 9<br>  | 10<br> | 11<br> | 12<br> |
|                                 | 13<br> | 14<br> | 15<br> | 16<br> |

Figure S6. SEM images of aerogel obtained by freeze drying hydrogels samples 1-16.



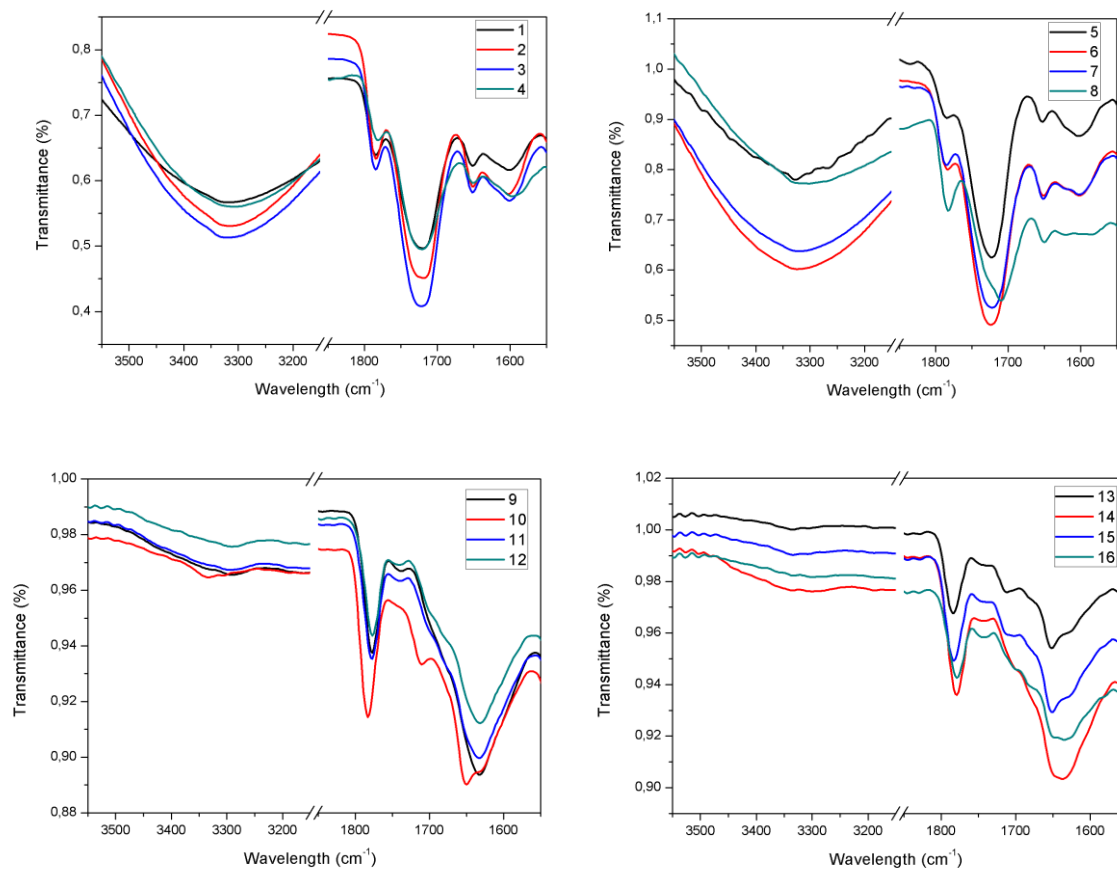

**Figure S7.** Selected regions of ATR-IR spectra of aerogels 1-16.

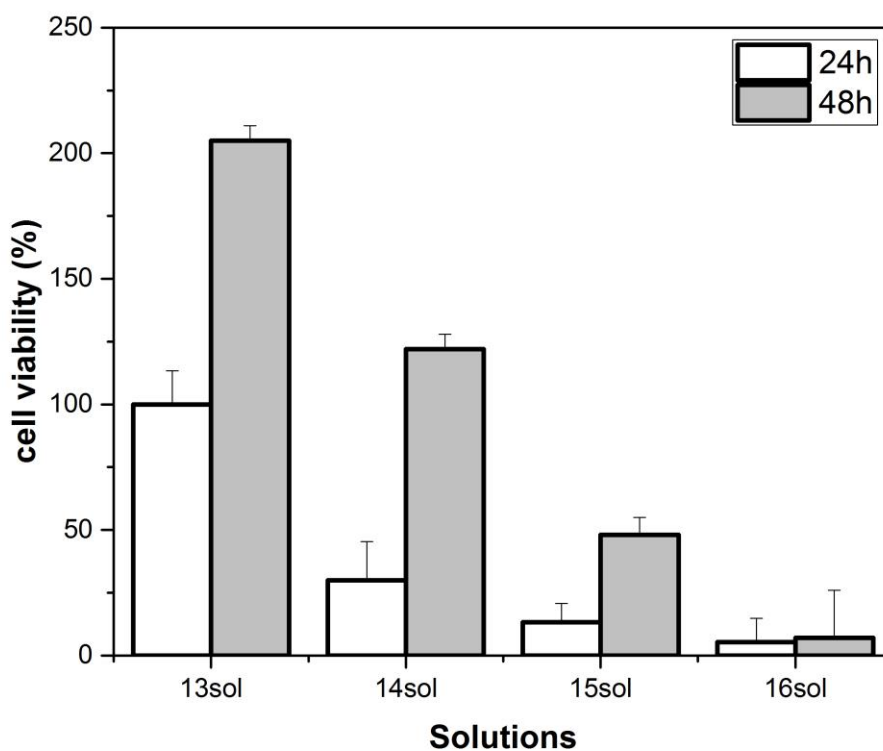

**Figure S8.** Cell viability of NIH-3T3 in cellular medium solution. We tested (from left to right): **13**: cellular medium added with gelator (2%); **14**: cellular medium added with graphene (0.5 mg), **15**: cellular medium added with graphene (1 mg), **16**: cellular medium added with graphene (5 mg). Data represent the mean  $\pm$  standard deviation.
